# Supplementary material
Source: HighWire-hosted journal article supplement (http://dmd.aspetjournals.org/highwire/filestream/70655/field_highwire_adjunct_files/0/Supplemental_79152.pdf)

## **Supplemental Material**

### **Comparison of Species and Cell-Type Differences in Fraction Unbound of Liver Tissues, Hepatocytes and Cell-Lines**

Keith Riccardi, Sangwoo Ryu, Jian Lin, Phillip Yates, David Tess, Rui Li, Dhirender

Singh, Brian R. Holder, Brendon Kapinos, George Chang, Li Di

Drug Metabolism and Disposition

#### **Table Legend**

Table 1s. Pearson correlation coefficients for  $f_u$ . Pairwise correlation estimates for all species and cell types using  $\log_2$  (geomean  $f_u$ ) per compound per matrix.

#### **Figure Legend**

Figure 1s. Sample variance versus geometric mean of the matrix quadruplicates. A slope of two for a simple linear fit of  $\log(y)$  vs.  $\log(x)$  (not shown) suggests a constant coefficient of variation across the range of  $f_u$ .

Figure 2s. Histogram and normal q-q plot of  $\log_2(f_u)$  for 22 compounds in rat liver (representative tissue example). The compound-to-compound variability for  $\log_2(f_u)$  is approximately normally distributed.

**Table 1s. Pearson correlation coefficients for  $f_u$ . Pairwise correlation estimates for all species and cell types using  $\log_2$  (geomean  $f_u$ ) per compound per matrix.**

| Correlation Coefficient | Mouse<br>Liver | Rat<br>Liver | Dog<br>Liver | Monkey<br>Liver | Human<br>Liver | Mouse<br>Hepatocyte | Rat<br>Hepatocyte | Dog<br>Hepatocyte | Monkey<br>Hepatocyte | Human<br>Hepatocyte | Huh7 | HEK293 |
|-------------------------|----------------|--------------|--------------|-----------------|----------------|---------------------|-------------------|-------------------|----------------------|---------------------|------|--------|
| Mouse Liver             | 1.00           | 0.94         | 0.95         | 0.96            | 0.92           | 0.93                | 0.94              | 0.93              | 0.94                 | 0.94                | 0.92 | 0.94   |
| Rat Liver               | 0.94           | 1.00         | 0.95         | 0.96            | 0.97           | 0.97                | 0.96              | 0.95              | 0.95                 | 0.96                | 0.95 | 0.96   |
| Dog Liver               | 0.95           | 0.95         | 1.00         | 0.96            | 0.95           | 0.93                | 0.95              | 0.93              | 0.94                 | 0.91                | 0.95 | 0.94   |
| Monkey Liver            | 0.96           | 0.96         | 0.96         | 1.00            | 0.95           | 0.95                | 0.97              | 0.94              | 0.93                 | 0.95                | 0.94 | 0.95   |
| Human Liver             | 0.92           | 0.97         | 0.95         | 0.95            | 1.00           | 0.95                | 0.95              | 0.93              | 0.95                 | 0.93                | 0.95 | 0.93   |
| Mouse Hepatocyte        | 0.93           | 0.97         | 0.93         | 0.95            | 0.95           | 1.00                | 0.96              | 0.92              | 0.90                 | 0.96                | 0.95 | 0.94   |
| Rat Hepatocyte          | 0.94           | 0.96         | 0.95         | 0.97            | 0.95           | 0.96                | 1.00              | 0.94              | 0.95                 | 0.97                | 0.94 | 0.95   |
| Dog Hepatocyte          | 0.93           | 0.95         | 0.93         | 0.94            | 0.93           | 0.92                | 0.94              | 1.00              | 0.93                 | 0.94                | 0.92 | 0.95   |
| Monkey Hepatocyte       | 0.94           | 0.95         | 0.94         | 0.93            | 0.95           | 0.90                | 0.95              | 0.93              | 1.00                 | 0.93                | 0.90 | 0.94   |
| Human Hepatocyte        | 0.94           | 0.96         | 0.91         | 0.95            | 0.93           | 0.96                | 0.97              | 0.94              | 0.93                 | 1.00                | 0.92 | 0.94   |
| Huh7                    | 0.92           | 0.95         | 0.95         | 0.94            | 0.95           | 0.95                | 0.94              | 0.92              | 0.90                 | 0.92                | 1.00 | 0.92   |
| HEK293                  | 0.94           | 0.96         | 0.94         | 0.95            | 0.93           | 0.94                | 0.95              | 0.95              | 0.94                 | 0.94                | 0.92 | 1.00   |

**Figure 1s. Sample variance versus geometric mean of the matrix quadruplicates. A slope of two for a simple linear fit of  $\log(y)$  vs.  $\log(x)$  (not shown) suggests a constant coefficient of variation across the range of  $f_u$ .**

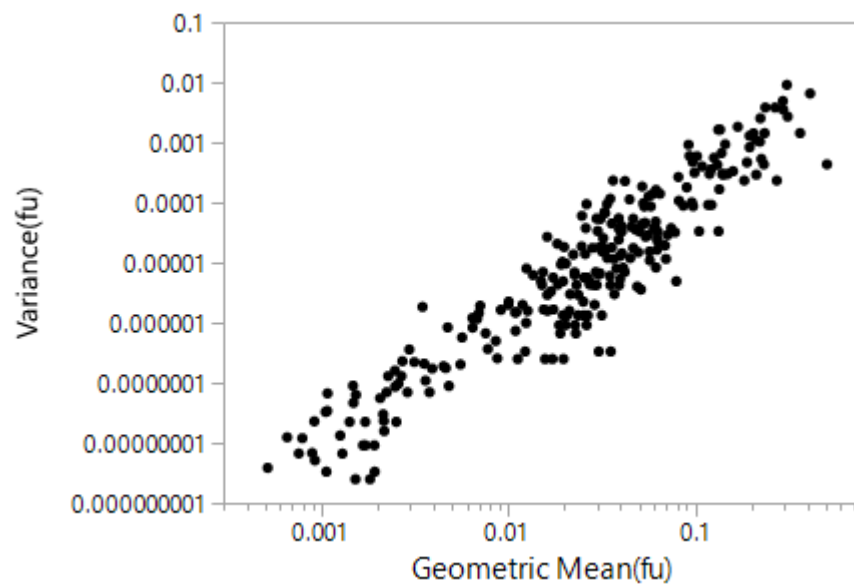

**Figure 2s. Histogram and normal q-q plot of  $\log_2(f_u)$  for 22 compounds in rat liver (representative tissue example). The compound-to-compound variability for  $\log_2(f_u)$  is approximately normally distributed.**

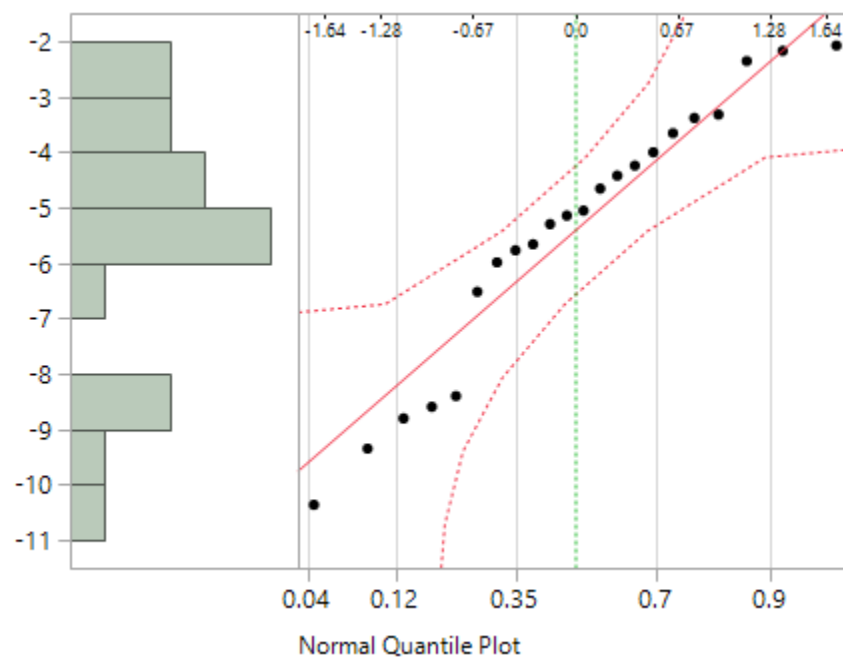

Supplement: Supplemental_79152.pdf [file Supplemental_79152.pdf]
